# Supplementary material for: Unprescribed cannabinoids and multiple sclerosis: a multicenter, cross-sectional, epidemiological study in Lombardy, Italy
Source: Springer Nature journal article supplement (doi:10.1007/s00415-024-12472-4), 2024-06-06
Supplement: MOESM1 [file 415_2024_12472_MOESM1_ESM-1.pdf]

# **Unprescribed cannabinoids and multiple sclerosis: a multicenter, cross-sectional, epidemiological study in Lombardy, Italy**

**Authors:** Riccardo Giossi, Martina Mercenari, Massimo Filippi, Chiara Zanetta, Carlo Giuseppe Antozzi, Laura Brambilla, Paolo Confalonieri, Sebastiano Giuseppe Crisafulli, Eugenia Tomas Roldan, Pietro Annovazzi, Marta Zaffira Conti, Caterina Barrilà, Marco Ronzoni, Monica Grobberio, Attilio Negri, Stefan Gustavsen, Valentina Torri Clerici

## **SUPPLEMENTARY MATERIALS**

|                 |                                                                                             |
|-----------------|---------------------------------------------------------------------------------------------|
| <b>Page 2.</b>  | <b>Supplementary Material S1. Participating Centers and personnel</b>                       |
| <b>Page 3.</b>  | <b>Supplementary Material S2. STROBE Checklist</b>                                          |
| <b>Page 5.</b>  | <b>Table S1. Main sociodemographic and clinical characteristics</b>                         |
| <b>Page 6.</b>  | <b>Table S2. Description of individual DMT received by included patients</b>                |
| <b>Page 7.</b>  | <b>Table S3. Main sociodemographic and clinical characteristics in RRMS patients</b>        |
| <b>Page 9.</b>  | <b>Table S4. Unprescribed cannabis consumption motivation in RRMS patients</b>              |
| <b>Page 10.</b> | <b>Table S5. Other sociodemographic variables in RRMS patients</b>                          |
| <b>Page 11.</b> | <b>Table S6. Concomitant medications and other substances in RRMS patients</b>              |
| <b>Page 12.</b> | <b>Table S7. Cannabis use characteristics in RRMS patients</b>                              |
| <b>Page 14.</b> | <b>Table S8. Cannabis effects on symptoms and medications modification in RRMS patients</b> |

## **Supplementary Material S1. Participating Centers and personnel**

- Fondazione IRCCS Istituto Neurologico Carlo Besta, Milano (*coordinating center*): Riccardo Giossi, Valentina Torri Clerici, Martina Mercenari, Paolo Confalonieri, Laura Brambilla, Carlo Antozzi, Sebastiano Giuseppe Crisafulli, Eugenia Tomas Roldan
- IRCCS Ospedale San Raffaele, Milano: Massimo Filippi, Chiara Zanetta
- ASST Rhodense, Ospedale di Garbagnate Milanese, Garbagnate Milanese: Marco Ronzoni, Caterina Barrilà
- ASST Ospedale Papa Giovanni XXIII, Bergamo: Marta Zaffira Conti
- ASST Valle Olona, PO di Gallarate, Varese: Pietro Annovazzi
- ASST Lariana, Ospedale Sant'Anna, San Fermo della Battaglia, Como: Monica Grobberio

## Supplementary Material S2. STROBE Checklist

|                              | Item No | Recommendation                                                                                                                                                                                    | Page |
|------------------------------|---------|---------------------------------------------------------------------------------------------------------------------------------------------------------------------------------------------------|------|
| <b>Title and abstract</b>    | 1       | (a) Indicate the study's design with a commonly used term in the title or the abstract                                                                                                            | 1    |
|                              |         | (b) Provide in the abstract an informative and balanced summary of what was done and what was found                                                                                               | 2    |
| <b>Introduction</b>          |         |                                                                                                                                                                                                   |      |
| Background/rationale         | 2       | Explain the scientific background and rationale for the investigation being reported                                                                                                              | 5    |
| Objectives                   | 3       | State specific objectives, including any prespecified hypotheses                                                                                                                                  | 5    |
| <b>Methods</b>               |         |                                                                                                                                                                                                   |      |
| Study design                 | 4       | Present key elements of study design early in the paper                                                                                                                                           | 5    |
| Setting                      | 5       | Describe the setting, locations, and relevant dates, including periods of recruitment, exposure, follow-up, and data collection                                                                   | 5-6  |
| Participants                 | 6       | (a) Give the eligibility criteria, and the sources and methods of selection of participants. Describe methods of follow-up                                                                        | 5    |
|                              |         | (b) For matched studies, give matching criteria and number of exposed and unexposed                                                                                                               | 5-6  |
| Variables                    | 7       | Clearly define all outcomes, exposures, predictors, potential confounders, and effect modifiers. Give diagnostic criteria, if applicable                                                          | 5-6  |
| Data sources/<br>measurement | 8*      | For each variable of interest, give sources of data and details of methods of assessment (measurement). Describe comparability of assessment methods if there is more than one group              | 5-6  |
| Bias                         | 9       | Describe any efforts to address potential sources of bias                                                                                                                                         | NA   |
| Study size                   | 10      | Explain how the study size was arrived at                                                                                                                                                         | 5-6  |
| Quantitative variables       | 11      | Explain how quantitative variables were handled in the analyses. If applicable, describe which groupings were chosen and why                                                                      | 6    |
| Statistical methods          | 12      | (a) Describe all statistical methods, including those used to control for confounding                                                                                                             | 6    |
|                              |         | (b) Describe any methods used to examine subgroups and interactions                                                                                                                               | 6    |
|                              |         | (c) Explain how missing data were addressed                                                                                                                                                       | 6    |
|                              |         | (d) If applicable, explain how loss to follow-up was addressed                                                                                                                                    | NA   |
|                              |         | (e) Describe any sensitivity analyses                                                                                                                                                             | NA   |
| <b>Results</b>               |         |                                                                                                                                                                                                   |      |
| Participants                 | 13*     | (a) Report numbers of individuals at each stage of study—eg numbers potentially eligible, examined for eligibility, confirmed eligible, included in the study, completing follow-up, and analysed | 7    |
|                              |         | (b) Give reasons for non-participation at each stage                                                                                                                                              | 7    |

|                          |     |                                                                                                                                                                                                              |                       |
|--------------------------|-----|--------------------------------------------------------------------------------------------------------------------------------------------------------------------------------------------------------------|-----------------------|
|                          |     | (c) Consider use of a flow diagram                                                                                                                                                                           | Fig.1                 |
| Descriptive data         | 14* | (a) Give characteristics of study participants (eg demographic, clinical, social) and information on exposures and potential confounders                                                                     | 7-9, Tab.1-6, Suppl.  |
|                          |     | (b) Indicate number of participants with missing data for each variable of interest                                                                                                                          | 7-9, Tab.1-6          |
|                          |     | (c) Summarise follow-up time (eg, average and total amount)                                                                                                                                                  | NA                    |
| Outcome data             | 15* | Report numbers of outcome events or summary measures over time                                                                                                                                               | 7-9, Tab.1-6          |
| Main results             | 16  | (a) Give unadjusted estimates and, if applicable, confounder-adjusted estimates and their precision (eg, 95% confidence interval). Make clear which confounders were adjusted for and why they were included | 7-9, Tab.1-6          |
|                          |     | (b) Report category boundaries when continuous variables were categorized                                                                                                                                    | 7-9, Tab.1-6          |
|                          |     | (c) If relevant, consider translating estimates of relative risk into absolute risk for a meaningful time period                                                                                             | NA                    |
| Other analyses           | 17  | Report other analyses done—eg analyses of subgroups and interactions, and sensitivity analyses                                                                                                               | 7-10, Tab.1-6, Suppl. |
| <b>Discussion</b>        |     |                                                                                                                                                                                                              |                       |
| Key results              | 18  | Summarise key results with reference to study objectives                                                                                                                                                     | 10-11                 |
| Limitations              | 19  | Discuss limitations of the study, taking into account sources of potential bias or imprecision. Discuss both direction and magnitude of any potential bias                                                   | 11                    |
| Interpretation           | 20  | Give a cautious overall interpretation of results considering objectives, limitations, multiplicity of analyses, results from similar studies, and other relevant evidence                                   | 9-11                  |
| Generalisability         | 21  | Discuss the generalisability (external validity) of the study results                                                                                                                                        | 9-12                  |
| <b>Other information</b> |     |                                                                                                                                                                                                              |                       |
| Funding                  | 22  | Give the source of funding and the role of the funders for the present study and, if applicable, for the original study on which the present article is based                                                | 4                     |

| Table S1. Main sociodemographic and clinical characteristics |                              |                         |                        |                        |         |                                 |                                      |         |
|--------------------------------------------------------------|------------------------------|-------------------------|------------------------|------------------------|---------|---------------------------------|--------------------------------------|---------|
| Variable                                                     | Total population<br>(n=2024) | Current user<br>(n=313) | Former user<br>(n=304) | Never user<br>(n=1407) | p-value | Current medical user<br>(n=154) | Current recreational user<br>(n=159) | p-value |
| <b>Nationality, n (%)</b>                                    |                              |                         |                        |                        | 0.901   |                                 |                                      | 1.000   |
| Italian                                                      | 1969 (97.3)                  | 306 (97.8)              | 296 (97.4)             | 1367 (97.2)            |         | 151 (98.1)                      | 155 (97.5)                           |         |
| EU                                                           | 31 (1.5)                     | 5 (1.6)                 | 4 (1.3)                | 22 (1.6)               |         | 2 (1.3)                         | 3 (1.9)                              |         |
| Extra EU                                                     | 24 (1.2)                     | 2 (0.6)                 | 4 (1.3)                | 18 (1.3)               |         | 1 (0.7)                         | 1 (0.6)                              |         |
| <b>Region of living, n (%)</b>                               |                              |                         |                        |                        | 0.768   |                                 |                                      | 0.719   |
| Lombardy                                                     | 1584 (78.3)                  | 237 (75.7)              | 249 (81.9)             | 1098 (78.4)            |         | 109 (70.8)                      | 128 (80.5)                           |         |
| Piedmont                                                     | 108 (5.34)                   | 16 (5.1)                | 15 (4.9)               | 77 (5.5)               |         | 8 (5.2)                         | 8 (5.0)                              |         |
| Emilia Romagna                                               | 52 (2.6)                     | 8 (2.6)                 | 9 (3.0)                | 35 (2.5)               |         | 4 (2.6)                         | 4 (2.5)                              |         |
| Puglia                                                       | 38 (1.9)                     | 9 (2.9)                 | 6 (2.0)                | 23 (1.6)               |         | 5 (3.3)                         | 4 (2.5)                              |         |
| Sicily                                                       | 36 (1.8)                     | 5 (1.6)                 | 6 (2.0)                | 25 (1.8)               |         | 2 (1.3)                         | 3 (1.9)                              |         |
| Calabria                                                     | 33 (1.6)                     | 7 (2.2)                 | 1 (0.3)                | 25 (1.8)               |         | 6 (3.9)                         | 1 (0.6)                              |         |
| Tuscany                                                      | 28 (1.4)                     | 6 (1.9)                 | 5 (1.6)                | 17 (1.2)               |         | 4 (2.6)                         | 2 (1.3)                              |         |
| Campania                                                     | 26 (1.3)                     | 5 (1.6)                 | 4 (1.3)                | 17 (1.2)               |         | 3 (2.0)                         | 2 (1.3)                              |         |
| Liguria                                                      | 26 (1.3)                     | 3 (1.0)                 | 2 (0.7)                | 21 (1.5)               |         | 1 (0.7)                         | 2 (1.3)                              |         |
| Veneto                                                       | 25 (1.2)                     | 4 (1.3)                 | 1 (0.3)                | 20 (1.4)               |         | 3 (2.0)                         | 1 (0.6)                              |         |
| Marche                                                       | 12 (0.6)                     | 2 (0.6)                 | 3 (1.0)                | 7 (0.5)                |         | 2 (1.3)                         | 0 (0.0)                              |         |
| Sardinia                                                     | 11 (1.5)                     | 3 (1.0)                 | 1 (0.3)                | 7 (0.5)                |         | 2 (1.3)                         | 1 (0.6)                              |         |
| Trentino Alto Adige                                          | 8 (0.4)                      | 0 (0.0)                 | 0 (0.0)                | 8 (0.6)                |         | 0 (0.0)                         | 0 (0.0)                              |         |
| Friuli Venezia Giulia                                        | 7 (0.4)                      | 1 (0.3)                 | 0 (0.0)                | 6 (0.4)                |         | 1 (0.7)                         | 0 (0.0)                              |         |
| Lazio                                                        | 6 (0.3)                      | 0 (0.0)                 | 1 (0.3)                | 5 (0.4)                |         | 0 (0.0)                         | 0 (0.0)                              |         |
| Umbria                                                       | 5 (0.3)                      | 1 (0.3)                 | 0 (0.0)                | 4 (0.3)                |         | 1 (0.7)                         | 0 (0.0)                              |         |
| Abruzzo                                                      | 5 (0.3)                      | 2 (0.6)                 | 0 (0.0)                | 3 (0.2)                |         | 1 (0.7)                         | 1 (0.6)                              |         |
| Basilicata                                                   | 4 (0.2)                      | 1 (0.3)                 | 1 (0.3)                | 2 (0.1)                |         | 1 (0.7)                         | 0 (0.0)                              |         |
| Valle d'Aosta                                                | 1 (0.1)                      | 1 (0.3)                 | 0 (0.0)                | 0 (0.0)                |         | 0 (0.0)                         | 1 (0.6)                              |         |
| Molise                                                       | 1 (0.1)                      | 0 (0.0)                 | 0 (0.0)                | 1 (0.1)                |         | 0 (0.0)                         | 0 (0.0)                              |         |
| Not living in Italy                                          | 8 (0.4)                      | 2 (0.6)                 | 0 (0.0)                | 6 (0.4)                |         | 1 (0.7)                         | 1 (0.6)                              |         |

Abbreviations: EU=European union.

| Table S2. Description of individual DMT received by included patients |                              |                         |                        |                        |         |                                 |                                      |         |
|-----------------------------------------------------------------------|------------------------------|-------------------------|------------------------|------------------------|---------|---------------------------------|--------------------------------------|---------|
| Variable                                                              | Total population<br>(n=2024) | Current user<br>(n=313) | Former user<br>(n=304) | Never user<br>(n=1407) | p-value | Current medical user<br>(n=154) | Current recreational user<br>(n=159) | p-value |
| <b>DMT, n (%)</b>                                                     |                              |                         |                        |                        | -       |                                 |                                      | -       |
| Glatiramer acetate                                                    | 178 (8.8)                    | 12 (3.8)                | 24 (7.9)               | 158 (11.9)             |         | 4 (2.6)                         | 8 (5.0)                              |         |
| Interferon beta-1a                                                    | 114 (5.6)                    | 9 (2.9)                 | 13 (4.5)               | 92 (6.5)               |         | 5 (3.3)                         | 4 (2.5)                              |         |
| Interferon beta-1b                                                    | 16 (0.8)                     | 1 (0.3)                 | 2 (0.7)                | 13 (1.0)               |         | 0                               | 1 (0.6)                              |         |
| Peginterferon                                                         | 48 (2.4)                     | 6 (1.9)                 | 5 (1.6)                | 37 (2.6)               |         | 5 (3.3)                         | 1 (0.6)                              |         |
| Dimethyl fumarate                                                     | 404 (20.0)                   | 75 (24.0)               | 69 (22.7)              | 260 (18.5)             |         | 29 (18.8)                       | 46 (28.9)                            |         |
| Teriflunomide                                                         | 238 (11.8)                   | 38 (12.1)               | 25 (8.2)               | 175 (12.4)             |         | 17 (11.0)                       | 21 (13.2)                            |         |
| Fingolimod                                                            | 317 (15.7)                   | 48 (15.3)               | 43 (14.1)              | 226 (16.1)             |         | 25 (16.2)                       | 23 (14.5)                            |         |
| Siponimod                                                             | 12 (0.6)                     | 0 (0.0)                 | 3 (1.0)                | 9 (0.6)                |         | 0 (0.0)                         | 0 (0.0)                              |         |
| Ozanimod                                                              | 17 (0.8)                     | 2 (0.6)                 | 4 (1.3)                | 11 (0.8)               |         | 1 (0.7)                         | 1 (0.6)                              |         |
| Ponesimod                                                             | 2 (0.1)                      | 1 (0.3)                 | 0 (0.0)                | 1 (0.1)                |         | 1 (0.7)                         | 0 (0.0)                              |         |
| Cladribine                                                            | 54 (2.7)                     | 14 (4.5)                | 9 (3.0)                | 31 (2.2)               |         | 5 (3.3)                         | 9 (5.7)                              |         |
| Natalizumab                                                           | 188 (9.3)                    | 35 (11.2)               | 36 (11.8)              | 117 (8.3)              |         | 20 (13.0)                       | 15 (9.4)                             |         |
| Ocrelizumab                                                           | 186 (9.2)                    | 36 (11.5)               | 31 (10.2)              | 119 (8.5)              |         | 20 (13.0)                       | 16 (10.0)                            |         |
| Ofatumumab                                                            | 5 (0.3)                      | 1 (0.3)                 | 0 (0.0)                | 4 (0.3)                |         | 0 (0.0)                         | 1 (0.6)                              |         |
| Rituximab                                                             | 4 (0.2)                      | 0 (0.0)                 | 0 (0.0)                | 4 (0.3)                |         | 0 (0.0)                         | 0 (0.0)                              |         |
| Alemtuzumab                                                           | 21 (1.0)                     | 4 (1.3)                 | 7 (2.3)                | 10 (0.7)               |         | 3 (2.0)                         | 1 (0.6)                              |         |
| Other immunosuppressants                                              | 6 (0.3)                      | 0 (0.0)                 | 1 (0.3)                | 5 (0.4)                |         | 0 (0.0)                         | 0 (0.0)                              |         |
| Investigational drug in clinical trial                                | 26 (1.3)                     | 6 (1.9)                 | 3 (1.0)                | 17 (1.2)               |         | 4 (2.6)                         | 2 (1.3)                              |         |
| None                                                                  | 188 (9.3)                    | 25 (8.0)                | 29 (9.5)               | 134 (9.5)              |         | 15 (9.7)                        | 10 (6.3)                             |         |

Abbreviations: DMT=disease-modifying treatment.

| Table S3. Main sociodemographic and clinical characteristics in RRMS patients                                               |                           |                      |                     |                     |                  |                              |                                   |                   |
|-----------------------------------------------------------------------------------------------------------------------------|---------------------------|----------------------|---------------------|---------------------|------------------|------------------------------|-----------------------------------|-------------------|
| Variable                                                                                                                    | Total population (n=1564) | Current user (n=241) | Former user (n=246) | Never user (n=1077) | p-value          | Current medical user (n=115) | Current recreational user (n=126) | p-value           |
| <b>Age, years</b>                                                                                                           |                           |                      |                     |                     | <b>0.0001</b>    |                              |                                   | 0.6757            |
| Mean (SD)                                                                                                                   | 43.9 (10.9)               | 37.8 (9.5)           | 40.5 (9.1)          | 46.1 (10.8)         |                  | 38.3 (10.2)                  | 37.3 (8.8)                        |                   |
| Median (IQR)                                                                                                                | 44 (35-52)                | 36 (31-44)           | 40 (34-46)          | 47 (38-54)          |                  | 36 (31-45)                   | 36 (31-44)                        |                   |
| <b>Gender, n (%)</b>                                                                                                        |                           |                      |                     |                     | <b>&lt;0.001</b> |                              |                                   | 0.195             |
| Female                                                                                                                      | 1045 (66.8)               | 117 (48.6)           | 141 (57.3)          | 787 (73.1)          |                  | 62 (53.9)                    | 55 (43.6)                         |                   |
| Non binary                                                                                                                  | 1 (0.1)                   | 0 (0.0)              | 0 (0.0)             | 1 (0.1)             |                  | 0 (0.0)                      | 0 (0.0)                           |                   |
| Prefer not to answer                                                                                                        | 2 (0.1)                   | 1 (0.4)              | 0 (0.0)             | 1 (0.1)             |                  | 0 (0.0)                      | 1 (0.8)                           |                   |
| <b>MS duration from onset, years</b>                                                                                        |                           |                      |                     |                     | <b>0.0001</b>    |                              |                                   | 0.4060            |
| Mean (SD)                                                                                                                   | 13.4 (9.0)                | 10.4 (7.7)           | 12.5 (8.3)          | 14.3 (9.3)          |                  | 10.3 (8.2)                   | 10.5 (7.1)                        |                   |
| Median (IQR)                                                                                                                | 12 (6-19)                 | 8 (5-14)             | 11 (7-17)           | 13 (7-21)           |                  | 8 (4-12)                     | 9 (5-14)                          |                   |
| <b>MS duration from diagnosis, years</b>                                                                                    |                           |                      |                     |                     | <b>0.0001</b>    |                              |                                   | 0.6160            |
| Mean (SD)                                                                                                                   | 11.6 (8.4)                | 9.0 (7.2)            | 10.6 (7.4)          | 12.4 (8.7)          |                  | 9.1 (6.9)                    | 8.8 (7.5)                         |                   |
| Median (IQR)                                                                                                                | 10 (5-16)                 | 7 (4-12)             | 9 (5-14)            | 11 (5-18)           |                  | 7 (4-13)                     | 7 (3-12)                          |                   |
| <b>Patients aware of their EDSS score, n (%)</b>                                                                            | 608 (38.9)                | 80 (33.2)            | 102 (41.5)          | 426 (39.6)          | 0.124            | 49 (42.6)                    |                                   |                   |
| <b>EDSS, points, median (IQR)</b>                                                                                           | 2.0 (1.0-3.0)             | 2.0 (1.5-3.5)        | 1.5 (1.0-3.0)       | 2.0 (1.0-3.0)       | 0.1232           | 2.5 (1.5-3.5)                | 1.5 (1.0-2.5)                     | <b>0.004</b>      |
| <b>PDDS, points, median (IQR)</b>                                                                                           | 0 (0-2)                   | 0 (0-2)              | 0 (0-2)             | 0 (0-2)             | 0.3782           | 1 (0-3)                      | 0 (0-1)                           | <b>&lt;0.0001</b> |
| <b>PDDS, from no to moderate disability, n (%)</b>                                                                          | 1275 (81.5)               | 198 (82.2)           | 211 (85.8)          | 866 (80.4)          | 0.142            | 83 (72.2)                    | 115 (91.3)                        |                   |
| <b>Spasticity, yes, n (%)</b>                                                                                               | 2896 (18.3)               | 54 (22.4)            | 36 (14.6)           | 196 (18.2)          | 0.085            | 40 (34.8)                    | 14 (11.1)                         | <b>&lt;0.001</b>  |
| <b>Spasticity, VAS</b>                                                                                                      |                           |                      |                     |                     | 0.7342           |                              |                                   | 0.3293            |
| Mean (SD)                                                                                                                   | 4.8 (2.4)                 | 4.5 (2.6)            | 4.38 (2.2)          | 4.9 (2.4)           |                  | 4.7 (2.7)                    | 4.0 (2.4)                         |                   |
| Median (IQR)                                                                                                                | 5 (3-7)                   | 5 (2-6)              | 5 (3-6)             | 5 (3-7)             |                  | 5 (3-6.5)                    | 4.5 (2-5)                         |                   |
| <b>Pain, yes, n (%)</b>                                                                                                     | 378 (24.2)                | 57 (23.7)            | 52 (21.1)           | 269 (25.0)          | 0.438            | 47 (40.9)                    | 10 (7.9)                          | <b>&lt;0.001</b>  |
| <b>Pain, VAS</b>                                                                                                            |                           |                      |                     |                     | 0.1891           |                              |                                   | 0.0849            |
| Mean (SD)                                                                                                                   | 5.4 (2.0)                 | 5.7 (2.1)            | 4.9 (2.1)           | 5.4 (2.0)           |                  | 5.9 (2.1)                    | 4.7 (1.6)                         |                   |
| Median (IQR)                                                                                                                | 5 (4-7)                   | 6 (4-7)              | 5 (3-7)             | 5 (4-7)             |                  | 6 (4-7)                      | 5 (3-5)                           |                   |
| <b>Spasm frequency, n (%)</b>                                                                                               |                           |                      |                     |                     | 0.152            |                              |                                   | <b>&lt;0.001</b>  |
| No                                                                                                                          | 1179 (75.4)               | 167 (69.3)           | 195 (79.3)          | 817 (75.9)          |                  | 61 (53.0)                    | 106 (84.1)                        |                   |
| Mild spasms induced by stimulation                                                                                          | 181 (11.6)                | 38 (15.8)            | 23 (9.4)            | 120 (11.1)          |                  | 25 (21.7)                    | 13 (10.3)                         |                   |
| Spasms occurring < 1 times per h                                                                                            | 150 (10.0)                | 26 (10.8)            | 20 (8.1)            | 104 (9.7)           |                  | 20 (17.4)                    | 6 (4.8)                           |                   |
| Spasms occurring > 1 times per h                                                                                            | 41 (2.6)                  | 6 (2.5)              | 8 (3.3)             | 27 (2.5)            |                  | 6 (5.2)                      | 0 (0.0)                           |                   |
| Spasms occurring > 10 times per h                                                                                           | 13 (0.8)                  | 4 (1.7)              | 0 (0.0)             | 9 (0.8)             |                  | 3 (2.6)                      | 1 (0.8)                           |                   |
| <b>Bowel or bladder impairment, n (%)</b>                                                                                   |                           |                      |                     |                     | 0.246            |                              |                                   | <b>0.007</b>      |
| No                                                                                                                          | 802 (51.3)                | 131 (54.4)           | 131 (53.3)          | 540 (50.1)          |                  | 48 (41.7)                    | 83 (65.9)                         |                   |
| Mild hesitation, urgency, or retention                                                                                      | 448 (28.6)                | 61 (25.3)            | 77 (31.3)           | 310 (28.8)          |                  | 37 (32.2)                    | 24 (19.1)                         |                   |
| Moderate hesitation, urgency, or retention or stypsis, and/or rare urinary incontinence                                     | 259 (16.6)                | 38 (15.8)            | 33 (13.4)           | 188 (17.5)          |                  | 24 (20.9)                    | 14 (11.1)                         |                   |
| Frequent urinary incontinence; necessity of intermittent auto-catheterization; necessity of manual aid for bowel evacuation | 25 (1.6)                  | 8 (3.3)              | 2 (0.8)             | 15 (1.4)            |                  | 5 (4.4)                      | 3 (2.4)                           |                   |
| Almost constant catheterization                                                                                             | 8 (0.5)                   | 1 (0.4)              | 1 (0.4)             | 6 (0.6)             |                  | 0 (0.0)                      | 1 (0.8)                           |                   |
| Loss of bladder or bowel function; permanent catheterization                                                                | 8 (0.5)                   | 2 (0.8)              | 0 (0.0)             | 6 (0.6)             |                  | 1 (0.9)                      | 1 (0.8)                           |                   |
| Loss of bladder and bowel function                                                                                          | 14 (0.9)                  | 0 (0.0)              | 2 (0.8)             | 12 (1.1)            |                  | 0 (0.0)                      | 0 (0.0)                           |                   |

| <b>MSQoL-29, mean (SD)</b>                                                                                                                                                                                                                                                                                                                                                                                       |              |             |             |              |               |             |             |                   |
|------------------------------------------------------------------------------------------------------------------------------------------------------------------------------------------------------------------------------------------------------------------------------------------------------------------------------------------------------------------------------------------------------------------|--------------|-------------|-------------|--------------|---------------|-------------|-------------|-------------------|
| Physical functioning                                                                                                                                                                                                                                                                                                                                                                                             | 80.9 (27.7)  | 83.4 (25.3) | 84.1 (25.6) | 79.65 (28.5) | <b>0.0497</b> | 75.0 (28.7) | 91.2 (18.6) | <b>&lt;0.0001</b> |
| Pain                                                                                                                                                                                                                                                                                                                                                                                                             | 78.7 (23.6)  | 79.1 (23.5) | 82.1 (20.8) | 77.8 (24.1)  | 0.1129        | 68.8 (25.5) | 88.7 (16.5) | <b>&lt;0.0001</b> |
| Emotional wellbeing                                                                                                                                                                                                                                                                                                                                                                                              | 65.2 (19.1)  | 65.9 (17.9) | 66.5 (18.1) | 64.7 (19.6)  | 0.4055        | 63.0 (17.9) | 68.6 (17.6) | <b>0.0279</b>     |
| Energy                                                                                                                                                                                                                                                                                                                                                                                                           | 49.6 (21.5)  | 49.7 (20.0) | 49.7 (18.9) | 49.6 (22.2)  | 0.9786        | 44.7 (19.2) | 54.5 (19.5) | <b>0.0007</b>     |
| Cognitive functioning                                                                                                                                                                                                                                                                                                                                                                                            | 68.7 (22.3)  | 66.9 (24.7) | 69.8 (21.4) | 68.7 (22.0)  | 0.6008        | 61.6 (25.2) | 71.8 (23.2) | <b>0.0014</b>     |
| Health stress                                                                                                                                                                                                                                                                                                                                                                                                    | 74.5 (24.1)  | 76.0 (24.2) | 75.4 (21.5) | 73.7 (24.7)  | 0.3859        | 69.3 (25.2) | 82.2 (20.5) | <b>&lt;0.0001</b> |
| Sexual functioning                                                                                                                                                                                                                                                                                                                                                                                               | 72.5 (32.2)  | 74.2 (31.9) | 70.6 (32.3) | 72.5 (32.3)  | 0.3662        | 70.7 (33.9) | 77.4 (29.6) | 0.1150            |
| Change in health                                                                                                                                                                                                                                                                                                                                                                                                 | 48.9 (22.4)  | 52.5 (31.9) | 51.1 (32.3) | 47.5 (21.7)  | <b>0.0080</b> | 49.8 (26.6) | 55.0 (21.3) | 0.1287            |
| Social functioning                                                                                                                                                                                                                                                                                                                                                                                               | 64.8 (27.3)  | 64.7 (27.8) | 66.3 (25.7) | 64.5 (27.5)  | 0.8072        | 55.1 (28.4) | 73.8 (24.1) | <b>&lt;0.0001</b> |
| Health perception                                                                                                                                                                                                                                                                                                                                                                                                | 47.5 (30.2)  | 49.7 (32.0) | 48.0 (29.5) | 46.9 (30.0)  | 0.6206        | 40.1 (30.6) | 58.7 (30.1) | <b>&lt;0.0001</b> |
| Overall QoL                                                                                                                                                                                                                                                                                                                                                                                                      | 68.8 (13.4)  | 69.3 (17.6) | 70.0 (18.1) | 68.5 (18.6)  | 0.6167        | 63.7 (17.6) | 74.5 (16.0) | <b>&lt;0.0001</b> |
| PCS                                                                                                                                                                                                                                                                                                                                                                                                              | 64.6 (18.0)  | 66.6 (17.6) | 65.8 (17.0) | 63.9 (18.3)  | 0.1272        | 60.4 (17.8) | 72.4 (15.3) | <b>&lt;0.0001</b> |
| MCS                                                                                                                                                                                                                                                                                                                                                                                                              | 65.5c (18.3) | 65.8 (18.0) | 66.9 (16.2) | 65.2 (18.8)  | 0.6470        | 59.3 (18.6) | 71.8 (15.1) | <b>&lt;0.0001</b> |
| <b>HADS</b>                                                                                                                                                                                                                                                                                                                                                                                                      |              |             |             |              |               |             |             |                   |
| Anxiety, mean (SD)                                                                                                                                                                                                                                                                                                                                                                                               | 6.2 (4.2)    | 5.8 (3.9)   | 6.4 (4.1)   | 6.2 (4.3)    | 0.4068        | 6.3 (4.1)   | 5.3 (3.7)   | 0.0670            |
| Depression, mean (SD)                                                                                                                                                                                                                                                                                                                                                                                            | 3.9 (3.5)    | 3.7 (3.2)   | 3.6 (3.2)   | 4.1 (3.7)    | 0.4188        | 3.9 (3.4)   | 3.5 (3.1)   | 0.4678            |
| Anxiety > 7 points, n (%)                                                                                                                                                                                                                                                                                                                                                                                        | 566 (36.2)   | 80 (33.2)   | 92 (37.4)   | 394 (36.6)   | 0.559         | 39 (33.9)   | 41 (32.5)   | 0.891             |
| Depression > 7 points, n (%)                                                                                                                                                                                                                                                                                                                                                                                     | 272 (17.4)   | 35 (14.5)   | 38 (15.5)   | 199 (18.5)   | 0.233         | 18 (15.7)   | 17 (13.5)   | 0.715             |
| Abbreviations: EDSS=expanded disability status scale; HADS=hospital anxiety and depression scale; IQR=interquartile range; MCS=mental composite score; MS=multiple sclerosis; MSQoL-29=29-questions Multiple Sclerosis Quality of Life; PCS=physical composite score; PDDS=patient determined disease steps; QoL=quality of life; RRMS=relapsing remitting MS; SD=standard deviation; VAS=visual analogue scale. |              |             |             |              |               |             |             |                   |

Table S3 (continued)

| Table S4. Unprescribed cannabis consumption motivation in RRMS patients                  |                           |                      |                     |                     |                  |                              |                                   |                  |
|------------------------------------------------------------------------------------------|---------------------------|----------------------|---------------------|---------------------|------------------|------------------------------|-----------------------------------|------------------|
| Variable                                                                                 | Total population (n=1564) | Current user (n=241) | Former user (n=246) | Never user (n=1077) | p-value          | Current medical user (n=115) | Current recreational user (n=126) | p-value          |
| <b>Disclosure of cannabis use to the physician, yes, n (%)</b>                           | -                         | 84 (34.9)            | -                   | -                   | -                | 53 (46.1)                    | 31 (24.6)                         | <b>0.001</b>     |
| <b>Cannabis current use motivation, n (%)</b>                                            |                           |                      |                     |                     | -                |                              |                                   | -                |
| Recreational                                                                             | -                         | 126 (52.3)           | -                   | -                   |                  | -                            | -                                 |                  |
| Medical                                                                                  | -                         | 38 (15.8)            | -                   | -                   |                  | -                            | -                                 |                  |
| Both                                                                                     | -                         | 77 (32.0)            | -                   | -                   |                  | -                            | -                                 |                  |
| <b>Did the patient used cannabis before the last 12 months (former user), yes, n (%)</b> | 470 (30.1)                | 224 (93.0)           | 246 (100.0)         | -                   | <b>&lt;0.001</b> | 103 (89.6)                   | 121 (96.0)                        | 0.076            |
| <b>Cannabis former use motivation, n (%)</b>                                             |                           |                      |                     |                     | <b>&lt;0.001</b> |                              |                                   | <b>&lt;0.001</b> |
| Recreational                                                                             | 365 (77.7)                | 146 (65.2)           | 219 (89.0)          | -                   |                  | 31 (30.1)                    | 115 (95.0)                        |                  |
| Medical                                                                                  | 25 (5.3)                  | 19 (8.5)             | 6 (2.4)             | -                   |                  | 18 (17.5)                    | 1 (0.8)                           |                  |
| Both                                                                                     | 80 (17.0)                 | 59 (26.3)            | 21 (8.5)            | -                   |                  | 54 (52.4)                    | 5 (4.1)                           |                  |
| <b>Who advise the patient to use cannabis for medical use, n (%)<sup>a</sup></b>         |                           |                      |                     |                     |                  |                              |                                   |                  |
| Personal idea                                                                            | -                         | 76 (66.1)            | 12 (44.4)           | -                   | <b>0.037</b>     | 76 (66.1)                    | 4 (66.7)                          | 1.000            |
| Friends                                                                                  | -                         | 29 (25.2)            | 9 (33.3)            | -                   | 0.391            | 29 (25.2)                    | 1 (16.7)                          | 1.000            |
| Family                                                                                   | -                         | 10 (8.7)             | 6 (22.2)            | -                   | <b>0.045</b>     | 10 (8.7)                     | 1 (16.7)                          | 0.443            |
| Internet                                                                                 | -                         | 33 (28.7)            | 6 (22.2)            | -                   | 0.498            | 33 (28.7)                    | 0 (0.0)                           | 0.187            |
| Patients' groups                                                                         | -                         | 25 (21.8)            | 7 (25.9)            | -                   | 0.639            | 25 (21.4)                    | 0 (0.0)                           | 0.343            |
| Physician                                                                                | -                         | 15 (13.4)            | 5 (18.5)            | -                   | 0.462            | 15 (13.0)                    | 1 (16.7)                          | 0.581            |
| Other healthcare workers                                                                 | -                         | 4 (3.5)              | 1 (3.7)             | -                   | 0.954            | 4 (3.5)                      | 1 (16.7)                          | 0.228            |
| Other                                                                                    | -                         | 15 (13.0)            | 5 (18.5)            | -                   | 0.462            | 15 (13.0)                    | 1 (16.7)                          | 0.581            |
| <b>Cannabis use interruption motivation (multiple choices possible), n (%)</b>           |                           |                      |                     |                     | -                |                              |                                   | -                |
| Lack of effect                                                                           | -                         | -                    | 13 (5.3)            | -                   |                  | -                            | -                                 |                  |
| Adverse effects                                                                          | -                         | -                    | 41 (16.7)           | -                   |                  | -                            | -                                 |                  |
| Fear of others judgement                                                                 | -                         | -                    | 18 (7.3)            | -                   |                  | -                            | -                                 |                  |
| Financial problems                                                                       | -                         | -                    | 8 (3.3)             | -                   |                  | -                            | -                                 |                  |
| Legal problems                                                                           | -                         | -                    | 18 (7.3)            | -                   |                  | -                            | -                                 |                  |
| Other                                                                                    | -                         | -                    | 184 (74.8)          | -                   |                  | -                            | -                                 |                  |
| <b>Patient would use cannabis if it was legal, n (%)</b>                                 | -                         | -                    | -                   | 427 (39.7)          | -                | -                            | -                                 | -                |
| <b>Reason of cannabis use if it was legal, n (%)</b>                                     |                           |                      |                     |                     | -                |                              |                                   | -                |
| Recreational                                                                             | -                         | -                    | -                   | 29 (6.8)            |                  | -                            | -                                 |                  |
| Medical                                                                                  | -                         | -                    | -                   | 303 (71.0)          |                  | -                            | -                                 |                  |
| Both                                                                                     | -                         | -                    | -                   | 95 (22.3)           |                  | -                            | -                                 |                  |

Abbreviations: RRMS=relapsing remitting multiple sclerosis.  
<sup>a</sup> Analysis performed only on those who reported medical or both medical and recreational use among current and former users.

| Table S5. Other sociodemographic variables in RRMS patients                      |                           |                      |                     |                     |                  |                              |                                   |              |
|----------------------------------------------------------------------------------|---------------------------|----------------------|---------------------|---------------------|------------------|------------------------------|-----------------------------------|--------------|
| Variable                                                                         | Total population (n=1564) | Current user (n=241) | Former user (n=246) | Never user (n=1077) | p-value          | Current medical user (n=115) | Current recreational user (n=126) | p-value      |
| <b>Instruction level, n (%)</b>                                                  |                           |                      |                     |                     | 0.145            |                              |                                   | <b>0.012</b> |
| None                                                                             | 2 (0.1)                   | 0 (0.0)              | 0 (0.0)             | 2 (0.2)             |                  | 0 (0.0)                      | 0 (0.0)                           |              |
| Elementary school                                                                | 8 (0.5)                   | 0 (0.0)              | 1 (0.4)             | 7 (0.7)             |                  | 0 (0.0)                      | 0 (0.0)                           |              |
| Secondary school                                                                 | 164 (10.5)                | 32 (13.3)            | 23 (9.4)            | 109 (10.1)          |                  | 13 (11.3)                    | 19 (15.1)                         |              |
| High school diploma                                                              | 743 (47.5)                | 110 (45.6)           | 105 (42.7)          | 528 (49.0)          |                  | 64 (55.7)                    | 46 (36.5)                         |              |
| University                                                                       | 478 (30.6)                | 64 (26.6)            | 89 (36.2)           | 325 (30.2)          |                  | 28 (24.4)                    | 36 (28.6)                         |              |
| Master/PhD/Postgraduate specializations                                          | 169 (10.8)                | 35 (14.5)            | 28 (11.4)           | 106 (9.8)           |                  | 10 (8.7)                     | 25 (19.8)                         |              |
| <b>Work, n (%)</b>                                                               |                           |                      |                     |                     | <b>&lt;0.001</b> |                              |                                   | <b>0.011</b> |
| Full time                                                                        | 981 (62.7)                | 162 (67.2)           | 173 (70.3)          | 646 (60.0)          |                  | 66 (57.4)                    | 96 (76.2)                         |              |
| Part time                                                                        | 289 (18.5)                | 38 (15.8)            | 44 (17.9)           | 207 (19.2)          |                  | 22 (19.1)                    | 16 (12.7)                         |              |
| Unemployed                                                                       | 218 (13.9)                | 39 (16.2)            | 23 (9.4)            | 156 (14.5)          |                  | 25 (21.7)                    | 14 (11.1)                         |              |
| Retirement                                                                       | 76 (4.39)                 | 2 (0.8)              | 6 (2.4)             | 68 (6.3)            |                  | 2 (1.7)                      | 0 (0.0)                           |              |
| <b>Annual income, n (%)<sup>a</sup></b>                                          |                           |                      |                     |                     | 0.587            |                              |                                   | <b>0.037</b> |
| 0 – 10000 €                                                                      | 207 (15.2)                | 38 (17.5)            | 31 (13.8)           | 138 (15.0)          |                  | 23 (20.0)                    | 15 (12.8)                         |              |
| 10000 – 15000 €                                                                  | 201 (14.8)                | 33 (15.2)            | 29 (12.9)           | 139 (15.1)          |                  | 16 (1.9)                     | 17 (14.5)                         |              |
| 15000 – 26000 €                                                                  | 464 (34.1)                | 77 (35.5)            | 84 (37.3)           | 303 (33.0)          |                  | 40 (34.8)                    | 37 (31.6)                         |              |
| 26000 – 55000 €                                                                  | 364 (26.8)                | 55 (25.4)            | 64 (28.4)           | 245 (26.7)          |                  | 19 (16.5)                    | 36 (30.8)                         |              |
| 55000 – 75000 €                                                                  | 75 (5.5)                  | 10 (4.6)             | 11 (4.9)            | 54 (5.9)            |                  | 2 (1.7)                      | 8 (6.8)                           |              |
| 75000 – 120000 €                                                                 | 42 (3.1)                  | 2 (0.9)              | 6 (2.7)             | 34 (3.7)            |                  | 0 (0.0)                      | 2 (1.7)                           |              |
| More than 120000 €                                                               | 8 (0.6)                   | 2 (0.9)              | 0 (0.0)             | 6 (0.7)             |                  | 0 (0.0)                      | 2 (1.7)                           |              |
| Prefer not to disclose                                                           | 203                       | 24                   | 21                  | 158                 |                  | 15                           | 9                                 |              |
| <b>Number of inhabitants of the municipality of residence, n (%)<sup>a</sup></b> |                           |                      |                     |                     | 0.225            |                              |                                   | 0.414        |
| Less than 2000                                                                   | 69 (4.7)                  | 9 (4.1)              | 12 (5.0)            | 48 (4.7)            |                  | 6 (5.2)                      | 3 (2.5)                           |              |
| 2000 – 10000                                                                     | 388 (26.2)                | 51 (23.0)            | 60 (24.8)           | 277 (27.2)          |                  | 28 (24.4)                    | 23 (19.5)                         |              |
| 10000 – 50000                                                                    | 486 (32.8)                | 63 (28.4)            | 78 (32.3)           | 345 (33.9)          |                  | 29 (25.2)                    | 34 (28.8)                         |              |
| 50000 – 250000                                                                   | 225 (15.2)                | 41 (18.5)            | 33 (13.6)           | 151 (14.8)          |                  | 17 (14.8)                    | 24 (20.3)                         |              |
| More than 250000                                                                 | 315 (21.2)                | 58 (36.1)            | 59 (24.4)           | 198 (19.4)          |                  | 24 (23.1)                    | 34 (28.8)                         |              |
| Do not know                                                                      | 81                        | 19                   | 4                   | 58                  |                  | 11                           | 8                                 |              |
| <b>Marital status, n (%)</b>                                                     |                           |                      |                     |                     | <b>&lt;0.001</b> |                              |                                   | 0.450        |
| Free                                                                             | 601 (38.4)                | 128 (53.1)           | 122 (49.6)          | 351 (32.6)          |                  | 65 (56.5)                    | 63 (50.0)                         |              |
| Married                                                                          | 841 (53.8)                | 98 (40.7)            | 107 (43.5)          | 636 (59.1)          |                  | 42 (36.5)                    | 56 (44.4)                         |              |
| Separated/Divorced                                                               | 122 (7.8)                 | 15 (6.2)             | 17 (6.9)            | 90 (8.4)            |                  | 7 (5.6)                      | 8 (7.0)                           |              |
| <b>Housing situation, n (%)</b>                                                  |                           |                      |                     |                     | <b>&lt;0.001</b> |                              |                                   | 0.647        |
| Living with the partner                                                          | 498 (31.8)                | 86 (35.7)            | 77 (31.3)           | 335 (31.1)          |                  | 43 (37.4)                    | 43 (34.1)                         |              |
| Living with partner and children                                                 | 551 (35.2)                | 50 (20.8)            | 82 (33.3)           | 419 (38.9)          |                  | 19 (16.5)                    | 31 (24.6)                         |              |
| Living with children                                                             | 75 (4.8)                  | 6 (2.5)              | 15 (6.1)            | 54 (5.0)            |                  | 3 (2.6)                      | 3 (2.4)                           |              |
| Living with parents or family of origin                                          | 195 (12.5)                | 48 (19.9)            | 30 (12.2)           | 117 (10.9)          |                  | 25 (21.7)                    | 23 (18.3)                         |              |
| Living alone                                                                     | 245 (15.7)                | 51 (21.2)            | 42 (17.1)           | 152 (14.1)          |                  | 25 (21.7)                    | 26 (20.6)                         |              |

Abbreviations: RRMS=relapsing remitting multiple sclerosis.  
<sup>a</sup> Patients who preferred not to disclose the data or were not aware/did not know were excluded from the statistical comparison.

| Table S6. Concomitant medications and other substances in RRMS patients |                           |                      |                     |                     |                  |                              |                                   |                  |
|-------------------------------------------------------------------------|---------------------------|----------------------|---------------------|---------------------|------------------|------------------------------|-----------------------------------|------------------|
| Variable                                                                | Total population (n=1564) | Current user (n=241) | Former user (n=246) | Never user (n=1077) | p-value          | Current medical user (n=115) | Current recreational user (n=126) | p-value          |
| <b>DMT lines, n (%)<sup>a</sup></b>                                     |                           |                      |                     |                     | 0.072            |                              |                                   | 0.188            |
| First line                                                              | 783 (50.1)                | 106 (44.0)           | 108 (44.0)          | 569 (52.8)          |                  | 44 (38.3)                    | 62 (49.2)                         |                  |
| Second line                                                             | 661 (42.3)                | 115 (47.7)           | 115 (46.8)          | 431 (40.0)          |                  | 60 (52.2)                    | 55 (43.7)                         |                  |
| Other                                                                   | 18 (1.2)                  | 2 (0.8)              | 3 (1.2)             | 13 (1.2)            |                  | 2 (1.7)                      | 0 (0.0)                           |                  |
| None                                                                    | 102 (6.5)                 | 18 (7.5)             | 20 (8.1)            | 64 (5.9)            |                  | 9 (7.8)                      | 9 (7.1)                           |                  |
| <b>Concomitant neurological/psychiatric drugs, n (%)</b>                | 370 (23.7)                | 60 (24.9)            | 52 (21.1)           | 258 (24.0)          | 0.571            | 39 (33.9)                    | 21 (16.7)                         | <b>0.003</b>     |
| <b>Concomitant analgesic drugs, n (%)</b>                               | 402 (25.7)                | 53 (22.0)            | 50 (20.3)           | 299 (27.8)          | <b>0.020</b>     | 38 (33.0)                    | 15 (11.9)                         | <b>&lt;0.001</b> |
| <b>Prescription cannabinoids in the last 12 months, n (%)</b>           | 63 (4.0)                  | 27 (11.2)            | 7 (2.9)             | 29 (2.7)            | <b>&lt;0.001</b> | 25 (21.7)                    | 2 (1.6)                           | <b>&lt;0.001</b> |
| <b>Alcohol use, n (%)</b>                                               |                           |                      |                     |                     | <b>&lt;0.001</b> |                              |                                   | <b>0.012</b>     |
| No                                                                      | 569 (36.4)                | 43 (17.8)            | 50 (20.4)           | 476 (44.2)          |                  | 28 (24.4)                    | 15 (11.9)                         |                  |
| Daily                                                                   | 114 (7.3)                 | 22 (9.1)             | 26 (10.6)           | 66 (6.1)            |                  | 6 (5.2)                      | 16 (12.7)                         |                  |
| 2-3 times weekly                                                        | 220 (14.1)                | 50 (20.8)            | 39 (15.9)           | 131 (12.2)          |                  | 17 (14.8)                    | 33 (26.2)                         |                  |
| 1 time weekly                                                           | 296 (19.0)                | 66 (27.4)            | 58 (23.7)           | 172 (16.0)          |                  | 31 (27.0)                    | 35 (27.8)                         |                  |
| 1-2 times monthly                                                       | 223 (14.3)                | 46 (19.1)            | 45 (17.8)           | 132 (12.3)          |                  | 24 (20.9)                    | 22 (17.5)                         |                  |
| Less than 1 time monthly                                                | 140 (9.0)                 | 14 (5.8)             | 27 (11.0)           | 99 (9.2)            |                  | 9 (7.8)                      | 5 (4.0)                           |                  |
| <b>Tobacco smoke, n (%)</b>                                             | 428 (27.4)                | 146 (60.6)           | 89 (36.3)           | 193 (17.9)          | <b>&lt;0.001</b> | 69 (60.0)                    | 77 (61.1)                         | 0.895            |
| <b>Other psychoactive substances use, n (%)<sup>b</sup></b>             |                           |                      |                     |                     | <b>&lt;0.001</b> |                              |                                   | 1.000            |
| Yes                                                                     | 18 (1.2)                  | 11 (4.7)             | 3 (1.2)             | 4 (0.37)            |                  | 5 (4.5)                      | 6 (4.8)                           |                  |
| Prefer not to disclose                                                  | 16                        | 6                    | 0                   | 10                  |                  | 4                            | 2                                 |                  |

Abbreviations: DMT=disease-modifying treatment; RRMS=relapsing remitting multiple sclerosis.

<sup>a</sup> First line DMTs included glatiramoids, interferons, dimethyl fumarate, and teriflunomide; second line DMTs included fingolimod, Siponimod, ozanimod, ponesimod, cladribine, natalizumab, ocrelizumab, ofatumumab, rituximab, and alemtuzumab; other included other immunosuppressants and investigational drugs in clinical trial.

<sup>b</sup> Patients who preferred not to disclose the data were excluded from the statistical comparison.

| Table S7. Cannabis use characteristics in RRMS patients |                              |                         |                        |                        |                  |                                 |                                      |                  |
|---------------------------------------------------------|------------------------------|-------------------------|------------------------|------------------------|------------------|---------------------------------|--------------------------------------|------------------|
| Variable                                                | Total population<br>(n=1564) | Current user<br>(n=241) | Former user<br>(n=246) | Never user<br>(n=1077) | p-value          | Current medical user<br>(n=115) | Current recreational user<br>(n=126) | p-value          |
| <b>Main source of cannabis supply, n (%)</b>            |                              |                         |                        |                        | <b>&lt;0.003</b> |                                 |                                      | 0.992            |
| Friends or family                                       | -                            | 95 (59.8)               | 130 (66.3)             | -                      |                  | 38 (58.5)                       | 57 (60.6)                            |                  |
| Street market                                           | -                            | 48 (30.2)               | 63 (32.1)              | -                      |                  | 20 (30.8)                       | 28 (29.8)                            |                  |
| Dark web                                                | -                            | 7 (4.4)                 | 0 (0.0)                | -                      |                  | 3 (4.6)                         | 4 (4.3)                              |                  |
| Own cultivation                                         | -                            | 9 (5.7)                 | 3 (1.5)                | -                      |                  | 4 (6.2)                         | 5 (5.3)                              |                  |
| Prefer not to disclose <sup>a</sup>                     | -                            | 80                      | 47                     | -                      |                  | 48                              | 32                                   |                  |
| <b>Issues related to cannabis use, n (%)</b>            |                              |                         |                        |                        | <b>&lt;0.001</b> |                                 |                                      | <b>0.010</b>     |
| Legal issues                                            | -                            | 7 (3.2)                 | 5 (2.2)                | -                      |                  | 4 (3.9)                         | 3 (2.6)                              |                  |
| Supply issues                                           | -                            | 53 (24.1)               | 16 (7.0)               | -                      |                  | 35 (33.7)                       | 18 (15.5)                            |                  |
| Both legal and supply issues                            | -                            | 9 (4.1)                 | 4 (1.7)                | -                      |                  | 5 (4.8)                         | 4 (3.5)                              |                  |
| None                                                    | -                            | 151 (68.6)              | 205 (89.1)             | -                      |                  | 60 (57.7)                       | 91 (78.5)                            |                  |
| Prefer not to disclose <sup>a</sup>                     | -                            | 21                      | 16                     | -                      |                  | 11                              | 10                                   |                  |
| <b>Weekly cannabis cost estimate, n (%)</b>             |                              |                         |                        |                        | <b>&lt;0.001</b> |                                 |                                      | 0.103            |
| 0-5 €                                                   | -                            | 68 (36.6)               | 103 (63.2)             | -                      |                  | 25 (29.1)                       | 43 (43.0)                            |                  |
| 5-10 €                                                  | -                            | 38 (20.4)               | 33 (20.3)              | -                      |                  | 15 (17.4)                       | 23 (23.0)                            |                  |
| 10-25 €                                                 | -                            | 41 (22.0)               | 17 (10.4)              | -                      |                  | 22 (25.6)                       | 19 (19.0)                            |                  |
| 25-50 €                                                 | -                            | 24 (12.9)               | 8 (4.9)                | -                      |                  | 13 (15.1)                       | 11 (11.0)                            |                  |
| 50-100 €                                                | -                            | 12 (6.5)                | 0 (0.0)                | -                      |                  | 9 (10.5)                        | 3 (3.0)                              |                  |
| More than 100 €                                         | -                            | 3 (1.6)                 | 2 (1.2)                | -                      |                  | 2 (2.3)                         | 1 (1.0)                              |                  |
| Do not know <sup>a</sup>                                | -                            | 41                      | 73                     | -                      |                  | 20                              | 21                                   |                  |
| Prefer not to disclose <sup>a</sup>                     | -                            | 14                      | 9                      | -                      |                  | 9                               | 5                                    |                  |
| <b>Principal way of cannabis assumption, n (%)</b>      |                              |                         |                        |                        | <b>0.001</b>     |                                 |                                      | <b>0.002</b>     |
| Smoked (cigarette)                                      | -                            | 205 (85.1)              | 229 (93.1)             | -                      |                  | 88 (76.5)                       | 117 (92.9)                           |                  |
| Smoked (pipe)                                           | -                            | 0 (0.0)                 | 4 (1.6)                | -                      |                  | 0 (0.0)                         | 0 (0.0)                              |                  |
| Vaped (electronic cigarette)                            | -                            | 2 (0.8)                 | 1 (0.4)                | -                      |                  | 0 (0.0)                         | 2 (1.6)                              |                  |
| Vaped (vaporization)                                    | -                            | 8 (3.3)                 | 1 (0.4)                | -                      |                  | 5 (4.4)                         | 3 (2.4)                              |                  |
| Infuse                                                  | -                            | 9 (3.7)                 | 4 (1.6)                | -                      |                  | 9 (7.8)                         | 0 (0.0)                              |                  |
| Cooked (cookies, cakes)                                 | -                            | 1 (0.4)                 | 4 (1.6)                | -                      |                  | 1 (0.9)                         | 0 (0.0)                              |                  |
| Ingestion as oil                                        | -                            | 14 (5.8)                | 2 (0.8)                | -                      |                  | 11 (9.6)                        | 3 (2.4)                              |                  |
| Other                                                   | -                            | 2 (0.8)                 | 1 (0.4)                | -                      |                  | 1 (0.9)                         | 1 (0.8)                              |                  |
| <b>Frequency of cannabis administration, n (%)</b>      |                              |                         |                        |                        | <b>&lt;0.001</b> |                                 |                                      | <b>&lt;0.001</b> |
| Daily                                                   | -                            | 95 (39.4)               | 20 (8.1)               | -                      |                  | 53 (46.1)                       | 42 (33.3)                            |                  |
| 5-6 days per week                                       | -                            | 6 (2.5)                 | 4 (1.6)                | -                      |                  | 6 (5.2)                         | 0 (0.0)                              |                  |
| 3-4 days per week                                       | -                            | 34 (14.1)               | 19 (7.7)               | -                      |                  | 15 (13.0)                       | 19 (15.1)                            |                  |
| 1-2 times monthly                                       | -                            | 40 (16.6)               | 63 (25.6)              | -                      |                  | 24 (20.9)                       | 16 (12.7)                            |                  |
| Less than 1 time monthly                                | -                            | 66 (27.4)               | 140 (56.9)             | -                      |                  | 17 (14.8)                       | 49 (38.9)                            |                  |
| <b>Type of assumed cannabis, n (%)</b>                  |                              |                         |                        |                        | <b>0.013</b>     |                                 |                                      | <b>0.015</b>     |
| High THC (e.g., hashish, marijuana)                     | -                            | 176 (77.2)              | 152 (86.9)             | -                      |                  | 78 (70.3)                       | 98 (83.8)                            |                  |
| Only CBD (e.g., cannabis light)                         | -                            | 52 (22.8)               | 23 (13.1)              | -                      |                  | 33 (29.7)                       | 19 (16.2)                            |                  |
| Not aware <sup>a</sup>                                  | -                            | 13                      | 71                     | -                      |                  | 4                               | 9                                    |                  |
| <b>Amount of consumed cannabis variation, n (%)</b>     |                              |                         |                        |                        | <b>&lt;0.001</b> |                                 |                                      | <b>&lt;0.001</b> |
| Increased during time                                   | -                            | 18 (7.5)                | 0 (0.0)                | -                      |                  | 10 (8.7)                        | 8 (6.4)                              |                  |
| Reduced during time                                     | -                            | 71 (29.5)               | 171 (69.8)             | -                      |                  | 18 (15.7)                       | 53 (42.1)                            |                  |

|                                                |   |            |            |   |                  |            |            |              |
|------------------------------------------------|---|------------|------------|---|------------------|------------|------------|--------------|
| Varying depending on the period                | - | 60 (24.9)  | 23 (9.4)   | - |                  | 38 (33.0)  | 22 (17.5)  |              |
| Unvaried                                       | - | 92 (38.2)  | 51 (20.8)  | - |                  | 49 (42.56) | 43 (34.1)  |              |
| <b>Variability of cannabis effects, n (%)</b>  |   |            |            |   | 0.134            |            |            | 0.351        |
| Yes                                            | - | 50 (27.2)  | 40 (35.4)  | - |                  | 27 (30.3)  | 23 (24.2)  |              |
| No                                             | - | 134 (72.8) | 73 (64.6)  | - |                  | 62 (69.7)  | 72 (753.8) |              |
| Not know/Not remember <sup>a</sup>             | - | 57         | 132        | - |                  | 26         | 31         |              |
| <b>Type of variability, n (%)</b>              |   |            |            |   | 0.720            |            |            | 0.283        |
| Increased effects                              | - | 20 (40.0)  | 13 (32.5)  | - |                  | 10 (37.0)  | 10 (43.5)  |              |
| Reduced effects                                | - | 9 (18.0)   | 7 (17.5)   | - |                  | 7 (25.9)   | 2 (8.7)    |              |
| Unexpected effects                             | - | 21 (42.0)  | 20 (50.0)  | - |                  | 10 (37.0)  | 11 (47.8)  |              |
| <b>Cannabis-related adverse effects, n (%)</b> |   | 155 (64.3) | 154 (62.6) |   | 0.708            | 62 (53.9)  | 93 (73.8)  | <b>0.002</b> |
| Dry mouth                                      | - | 99 (63.9)  | 76 (49.4)  | - | <b>0.012</b>     | 45 (72.6)  | 54 (58.1)  | 0.088        |
| Mucosal irritation                             | - | 9 (5.8)    | 6 (3.9)    | - | 0.598            | 2 (3.2)    | 7 (7.5)    | 0.317        |
| Weakness                                       | - | 20 (12.9)  | 25 (16.2)  | - | 0.425            | 5 (8.1)    | 15 (16.1)  | 0.221        |
| Dizziness                                      | - | 35 (22.6)  | 66 (42.9)  | - | <b>&lt;0.001</b> | 17 (27.4)  | 18 (19.4)  | 0.247        |
| Tachycardia                                    | - | 61 (39.4)  | 47 (30.5)  | - | 0.121            | 22 (35.5)  | 39 (41.9)  | 0.503        |
| Movement disorders                             | - | 15 (9.7)   | 15 (9.7)   | - | 1.000            | 4 (6.5)    | 11 (11.8)  | 0.406        |
| Anxiety                                        | - | 35 (22.6)  | 46 (29.9)  | - | 0.156            | 13 (21.0)  | 22 (23.7)  | 0.845        |
| Panic                                          | - | 11 (7.1)   | 18 (11.7)  | - | 0.178            | 4 (6.5)    | 7 (7.5)    | 1.000        |
| Hallucinations                                 | - | 4 (2.6)    | 9 (5.8)    | - | 0.170            | 0 (0.0)    | 4 (4.3)    | 0.150        |
| Gastrointestinal disturbances                  | - | 4 (2.6)    | 4 (2.6)    | - | 1.000            | 2 (3.2)    | 2 (2.2)    | 1.000        |
| Sedation                                       | - | 9 (5.8)    | 21 (13.6)  | - | <b>0.022</b>     | 5 (8.1)    | 4 (4.3)    | 0.485        |
| Insomnia                                       | - | 6 (3.9)    | 6 (3.9)    | - | 1.000            | 3 (4.8)    | 3 (3.2)    | 0.684        |
| Memory disturbances                            | - | 33 (21.3)  | 18 (11.7)  | - | <b>0.031</b>     | 17 (27.4)  | 16 (17.2)  | 0.161        |
| Other                                          | - | 12 (7.7)   | 15 (9.7)   | - | 0.553            | 2 (3.2)    | 10 (10.8)  | 0.125        |

Abbreviations: CBD=cannabidiol; RRMS=relapsing remitting multiple sclerosis; THC=tetrahydrocannabinol.

<sup>a</sup> Patients who preferred not to disclose the data or were not aware/did not know were excluded from the statistical comparison.

Table S7 (continued)

| Table S8. Cannabis effects on symptoms and medications modification in RRMS patients                                        |                           |                      |                     |                     |                  |                              |                                   |                  |
|-----------------------------------------------------------------------------------------------------------------------------|---------------------------|----------------------|---------------------|---------------------|------------------|------------------------------|-----------------------------------|------------------|
| Variable                                                                                                                    | Total population (n=1564) | Current user (n=241) | Former user (n=246) | Never user (n=1077) | p-value          | Current medical user (n=115) | Current recreational user (n=126) | p-value          |
| <b>Any MS-related symptoms improved by cannabis assumption, n (%)</b>                                                       |                           |                      |                     |                     | <b>&lt;0.001</b> |                              |                                   | <b>&lt;0.001</b> |
| Yes                                                                                                                         | -                         | 141 (89.8)           | 36 (37.1)           | -                   |                  | 100 (100.0)                  | 41 (71.9)                         |                  |
| Not know <sup>a</sup>                                                                                                       | -                         | 84                   | 149                 | -                   |                  | 15                           | 69                                |                  |
| <b>Symptoms improved by cannabis assumption, n (%)</b>                                                                      |                           |                      |                     |                     |                  |                              |                                   |                  |
| Pain                                                                                                                        | -                         | 70 (49.7)            | 19 (52.8)           | -                   | 0.852            | 59 (59.0)                    | 11 (26.8)                         | <b>0.001</b>     |
| Spams or tremor                                                                                                             | -                         | 72 (51.1)            | 16 (44.4)           | -                   | 0.576            | 57 (57.0)                    | 15 (36.6)                         | <b>0.041</b>     |
| Sleep disturbances                                                                                                          | -                         | 91 (64.5)            | 22 (61.1)           | -                   | 0.702            | 72 (72.0)                    | 19 (46.3)                         | <b>0.006</b>     |
| Bowel or bladder disturbances                                                                                               | -                         | 19 (13.5)            | 4 (11.1)            | -                   | 1.000            | 13 (13.0)                    | 6 (14.6)                          | 0.790            |
| Appetite                                                                                                                    | -                         | 34 (24.1)            | 4 (11.1)            | -                   | 0.113            | 24 (24.0)                    | 10 (24.4)                         | 1.000            |
| Anxiety                                                                                                                     | -                         | 70 (49.7)            | 15 (41.7)           | -                   | 0.457            | 51 (51.0)                    | 19 (46.3)                         | 0.711            |
| Mood                                                                                                                        | -                         | 57 (40.4)            | 12 (33.3)           | -                   | 0.566            | 42 (42.0)                    | 15 (36.6)                         | 0.577            |
| Coping                                                                                                                      | -                         | 27 (19.2)            | 4 (11.1)            | -                   | 0.331            | 18 (18.0)                    | 9 (22.0)                          | 0.640            |
| Nausea, vomiting, and GI disturbances                                                                                       | -                         | 11 (7.8)             | 1 (2.8)             | -                   | 0.464            | 10 (10.0)                    | 1 (2.4)                           | 0.176            |
| Headache                                                                                                                    | -                         | 38 (27.0)            | 11 (30.6)           | -                   | 0.680            | 27 (27.0)                    | 11 (26.8)                         | 1.000            |
| Adverse effects of other drugs                                                                                              | -                         | 12 (8.51)            | 1 (2.8)             | -                   | 0.472            | 12 (12.0)                    | 0 (0.0)                           | <b>0.019</b>     |
| MS improvement                                                                                                              | -                         | 51 (36.2)            | 10 (27.8)           | -                   | 0.433            | 41 (41.0)                    | 10 (24.4)                         | 0.082            |
| Sensory symptoms                                                                                                            | -                         | 51 (36.2)            | 17 (47.2)           | -                   | 0.252            | 34 (34.0)                    | 17 (41.5)                         | 0.443            |
| Others                                                                                                                      | -                         | 23 (16.3)            | 2 (5.6)             | -                   | 0.114            | 16 (16.0)                    | 7 (17.1)                          | 1.000            |
| <b>Drugs for anxiety, sleep, pain, depression, or other conditions reduced due to cannabis assumption, n (%)</b>            |                           |                      |                     |                     | <b>0.011</b>     |                              |                                   | <b>&lt;0.001</b> |
| Yes, dose reduction of some drugs                                                                                           | -                         | 32 (29.9)            | 7 (16.7)            | -                   |                  | 25 (34.7)                    | 7 (20.0)                          |                  |
| Yes, discontinuation of some drugs                                                                                          | -                         | 40 (37.4)            | 10 (23.8)           | -                   |                  | 35 (48.6)                    | 5 (14.3)                          |                  |
| No, unvaried drugs assumption                                                                                               | -                         | 35 (32.7)            | 25 (59.5)           | -                   |                  | 12 (16.7)                    | 23 (65.7)                         |                  |
| No, never assumed these kinds of drugs <sup>b</sup>                                                                         | -                         | 91                   | 113                 | -                   |                  | 29                           | 62                                |                  |
| Not know <sup>b</sup>                                                                                                       | -                         | 43                   | 91                  | -                   |                  | 14                           | 29                                |                  |
| Abbreviations: MS=multiple sclerosis; RRMS=relapsing remitting MS.                                                          |                           |                      |                     |                     |                  |                              |                                   |                  |
| <sup>a</sup> Patients who did not know were excluded from the statistical comparison.                                       |                           |                      |                     |                     |                  |                              |                                   |                  |
| <sup>b</sup> Patients who did not know or never assumed these kinds of drugs were excluded from the statistical comparison. |                           |                      |                     |                     |                  |                              |                                   |                  |
